# Supplementary material for: CALR but Not JAK2 Mutations Are Associated with an Overexpression of Retinoid X Receptor Alpha in Essential Thrombocythemia
Source: MDPI journal article supplement (doi:10.3390/cancers16081511), 2024-04-16

## Supplementary Materials

# ***CALR* but not *JAK2* mutations are associated with an overexpression of Retinoid X Receptor Alpha in essential thrombocythemia**

Ana Guijarro-Hernández <sup>1</sup>, Cristina Hurtado <sup>1</sup>, María José Larráyo <sup>2</sup>, María José Calasanz <sup>2</sup> and José Luis Vizmanos <sup>1,\*</sup>

<sup>1</sup> Department of Biochemistry and Genetics, School of Sciences, University of Navarra, 31008 Pamplona, Spain

<sup>2</sup> CIMA LAB Diagnostics, Department of Biochemistry and Genetics, School of Sciences, University of Navarra, 31009 Pamplona, Spain

\* Correspondence: jlvizmanos@unav.es

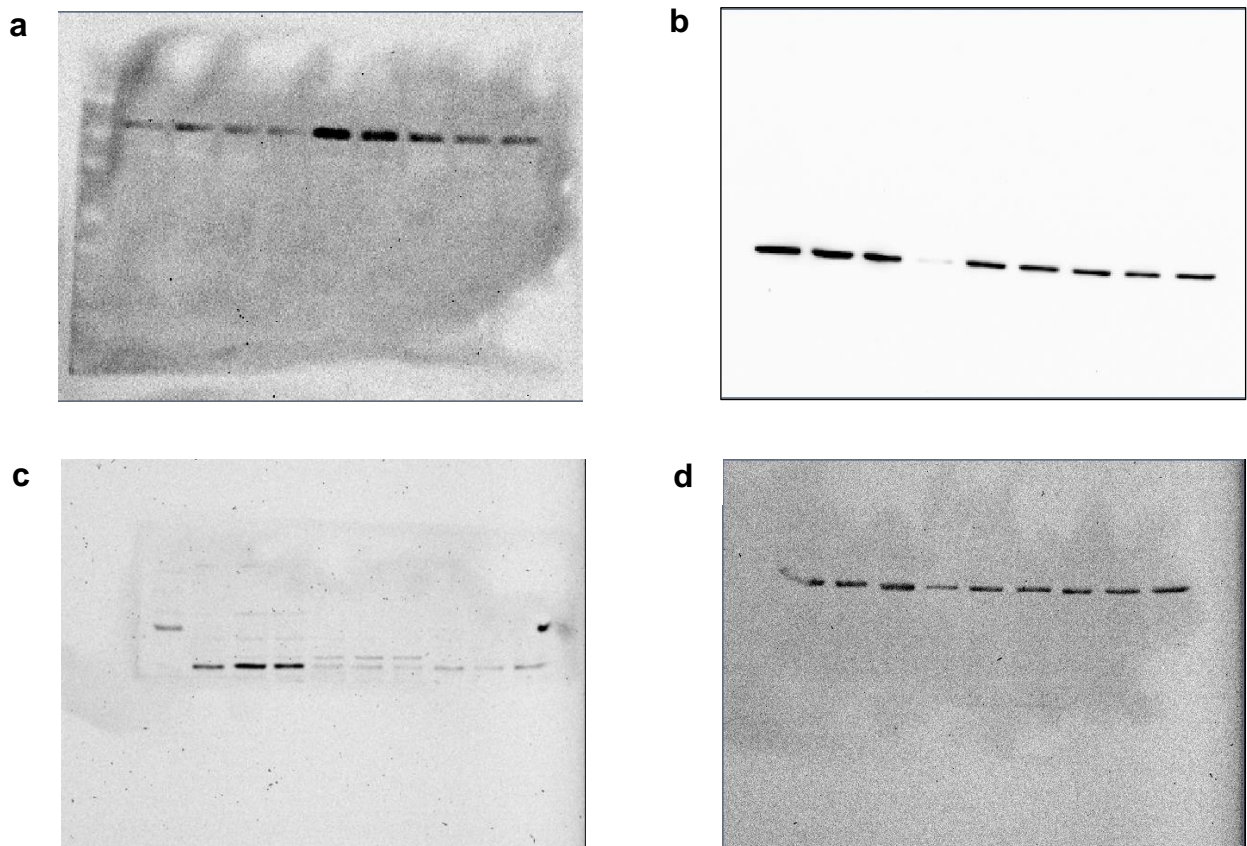

**Figure S1.** Uncropped Western Blot images. (a) RXR $\alpha$ . (b) B-actin for RXR $\alpha$  samples. (c) PPAR $\gamma$ . (d) B-actin for PPAR $\gamma$  samples.

*Please find the full Figure S2 on the following page.*

**Figure S2.** Results of a BLASTP search of the NHR-2 protein sequence provided by UniProt (Q10902) using UniProtKB/Swiss-Prot reference proteomes for Homo sapiens [9606] as the target database.



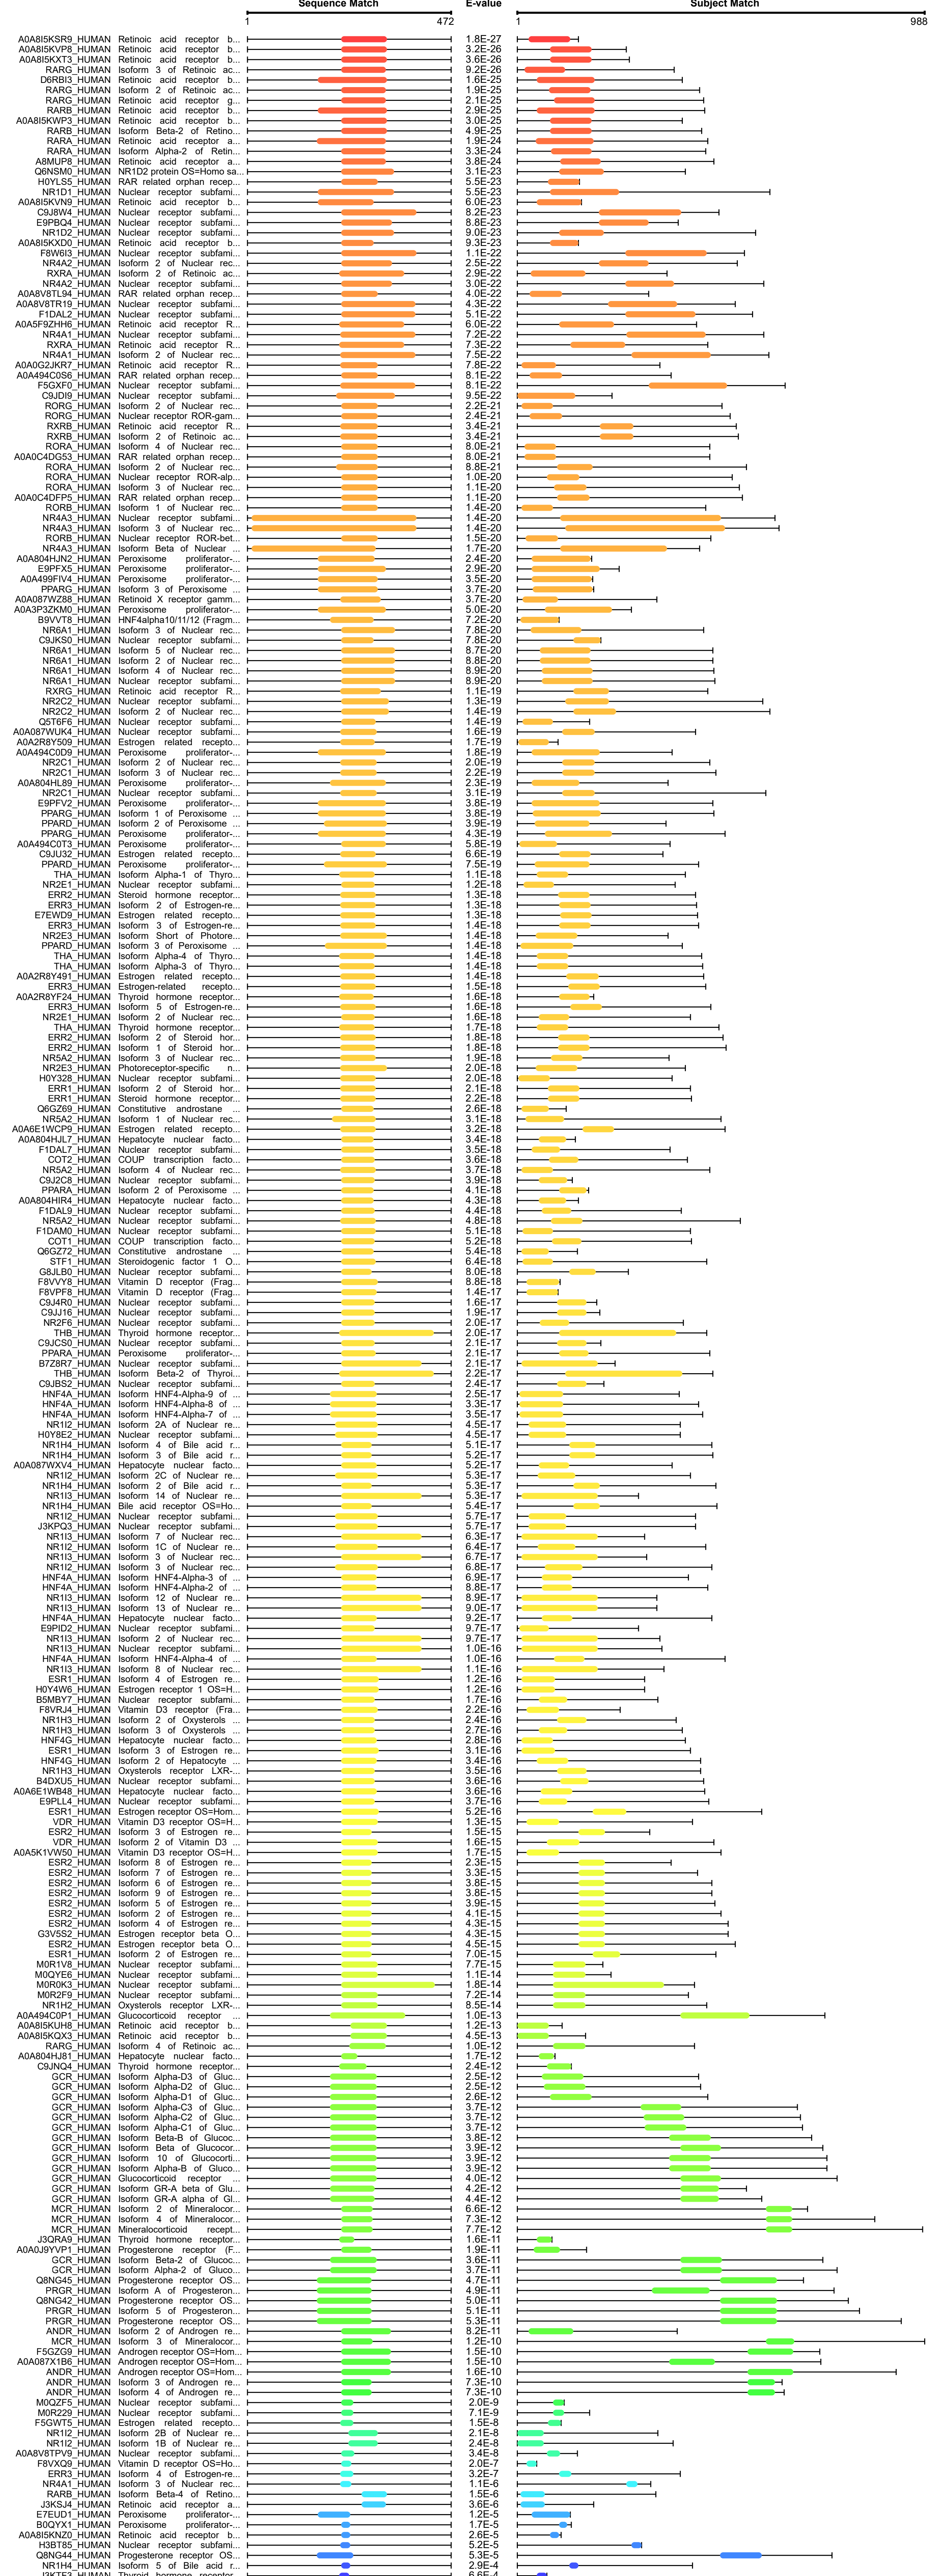

Supplement: s1 [file s1]
